# Supplementary material
Source: PubMed Central journal article supplement (PMC9398967)
Supplement: NIHMS1819171-supplement-2.pdf [file NIHMS1819171-supplement-2.pdf]

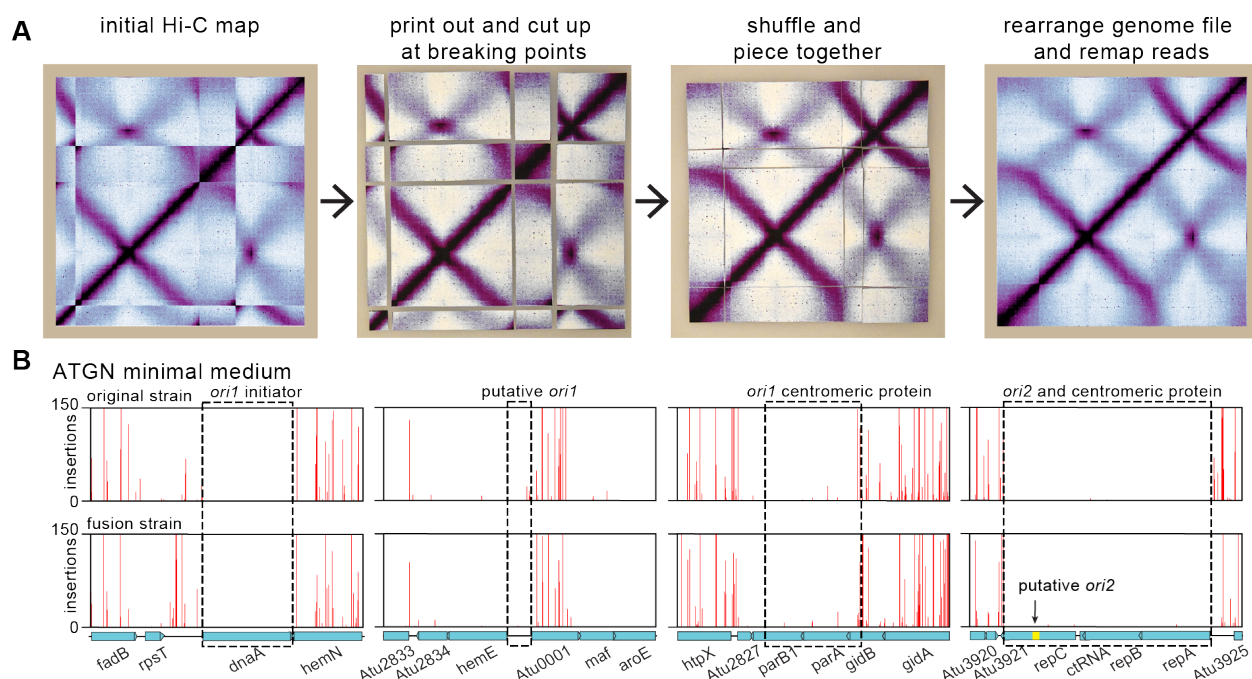

**Figure S1. *A. tumefaciens* fusion strain has a dicentric linear chromosome. Related to Figure 1 and Figure 2.**

**(A)** Deciphering the genome rearrangement. The Hi-C map generated by mapping Hi-C reads from *A. tumefaciens* C58 fusion strain to the original C58 reference genome (first panel) was printed out, cut up at breakpoints (second panel), and reassembled to generate a confluent picture (third panel). The pattern indicated that the circular Ch1 and linear Ch2 were fused into a large linear chromosome. When the same Hi-C data were mapped to the rearranged reference sequence, the same pattern was seen (fourth panel).

**(B)** The initiator proteins, replication origin sequences, and partitioning systems of both *ori1* and *ori2* are required for the survival of the original and fusion strains. Tn-seq plots showing transposon intolerance at indicated regions in the original strain (top) and the fusion strain (bottom). This screen was carried out in minimal ATGN medium.

**A** ATGN minimal medium

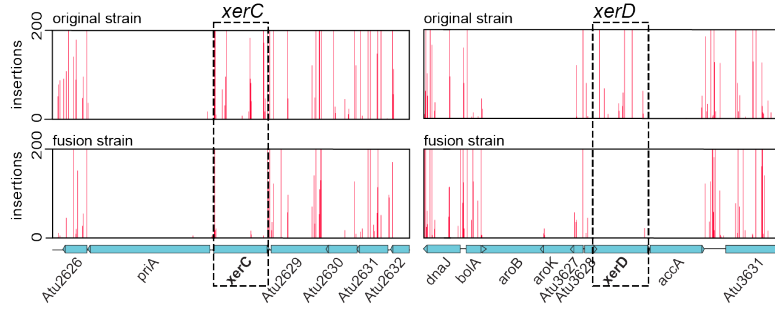

**B** ATGN minimal medium

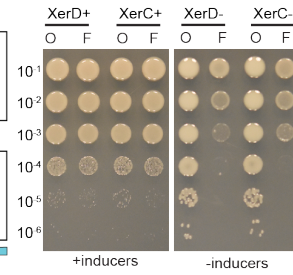

**C**

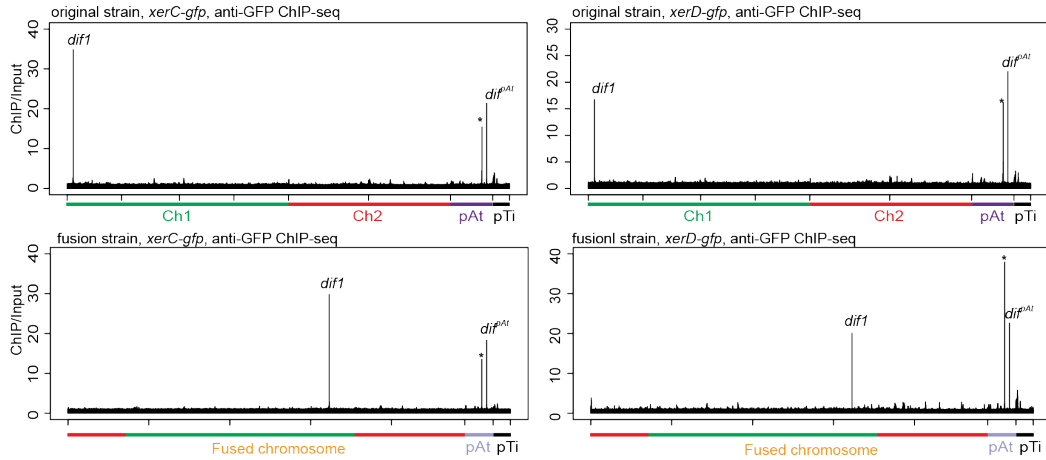

**D**

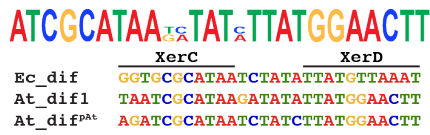

**E**

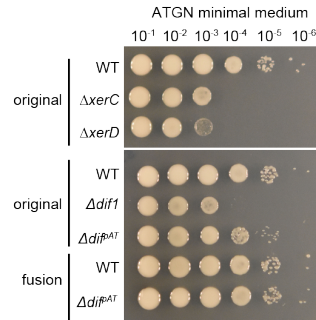

**F**

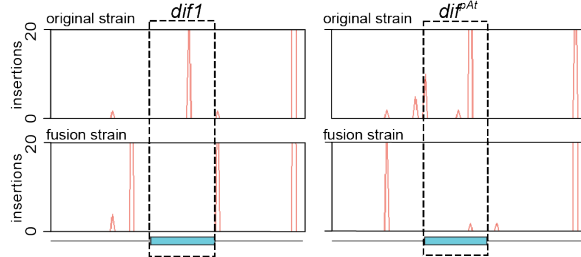

**G**

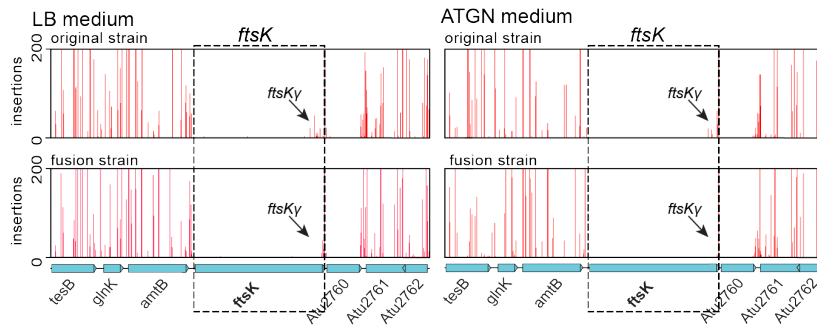

**H**

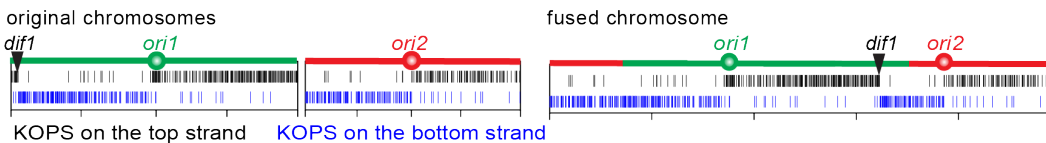

**Figure S2. Binding sites of XerC and XerD in the original and fusion strains. Related to Figure 3.**

**(A)** Tn-seq plots showing transposon insertions at *xerC/xerD* loci in the WT original strain (top) and the WT fusion strain (bottom) growing on ATGN plates.

**(B)** Validation of essentiality of *xerD* and *xerC* using depletion constructs, from left to right: AtWX332, AtWX327, AtWX331 and AtWX323. 10-fold serial dilutions of indicated strains were spotted on ATGN plates. The depletion constructs had the endogenous promoter of *xerD* or *xerC* replaced by *Plac-riboswitch*. 2 mM theophylline and 0.5 mM IPTG were added as inducers.

**(C)** ChIP enrichment of XerC-GFP and XerD-GFP in the original and fusion strains: top left, AtWX377 (original *xerC-gfpmut3*); top right, AtWX370 (original *xerD-gfpmut3*); bottom left, AtWX367 (fusion *xerC-gfpmut3*); bottom right, AtWX379 (fusion *xerD-gfpmut3*). The original strains were mapped to the original reference genome with *ori1* in the middle of Ch1, and the fusion strains were mapped to the re-arranged reference genome. x-axis shows genome positions and y-axis indicates ChIP enrichment (ChIP/input) in 1-kb bins. Asterisks indicate a systematic peak we observed for every anti-GFP ChIP-seq experiment.

**(D)** Top, logo of XerC/XerD binding sequence extracted from ChIP-seq peaks in **(C)**. Bottom, comparison of *A. tumefaciens dif1* and *dif<sup>At</sup>* with *E. coli dif* with indicated XerC and XerD binding arms.

**(E)** 10-fold serial dilutions of the indicated strains spotted on ATGN plates, from top to bottom: AtWX063, AtWX375, AtWX092, AtWX063, AtWX439, AtWX441, AtWX001 and AtWX440.

**(F)** Transposon insertions at *dif1* (left) and *dif<sup>At</sup>* (right) in the WT original strain (top) and the WT fusion strain (bottom) growing on LB plates.

**(G)** Tn-seq plots showing transposon insertions at *ftsK* locus in the WT original strain (top) and the WT fusion strain (bottom) growing on LB plates (left) and ATGN plates (right).

**(H)** Distributions of FtsK orienting polar sequences (KOPS) in original chromosomes (left) and the fused chromosome (right). KOPS (GGGNAGGG) on the top (Watson) strand and on the bottom (Crick) strand are shown as black and blue bars, respectively.

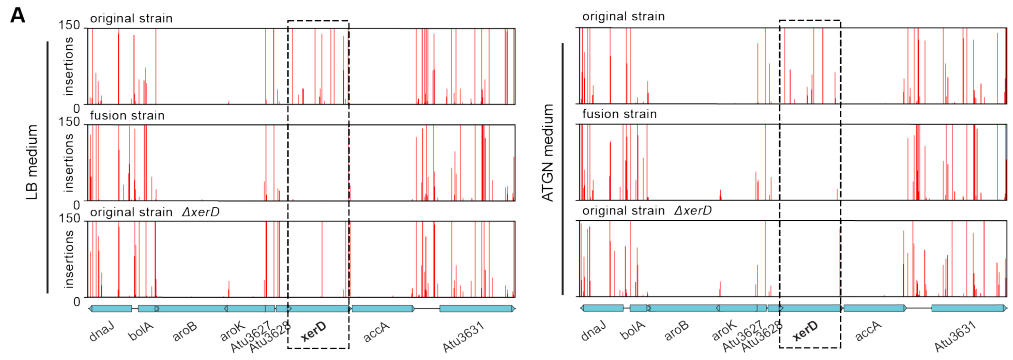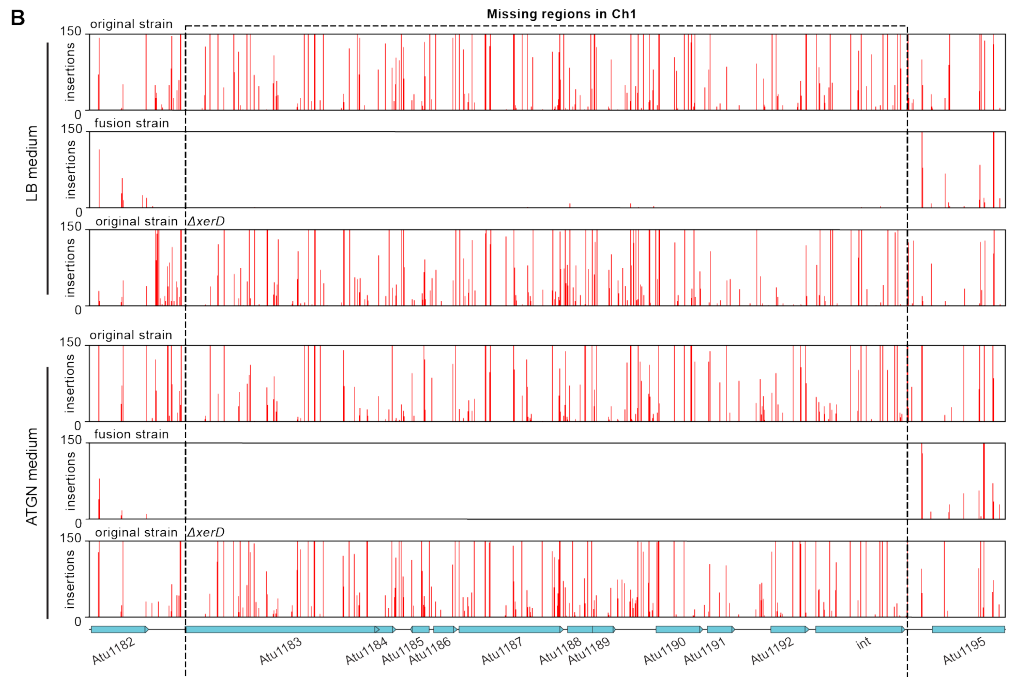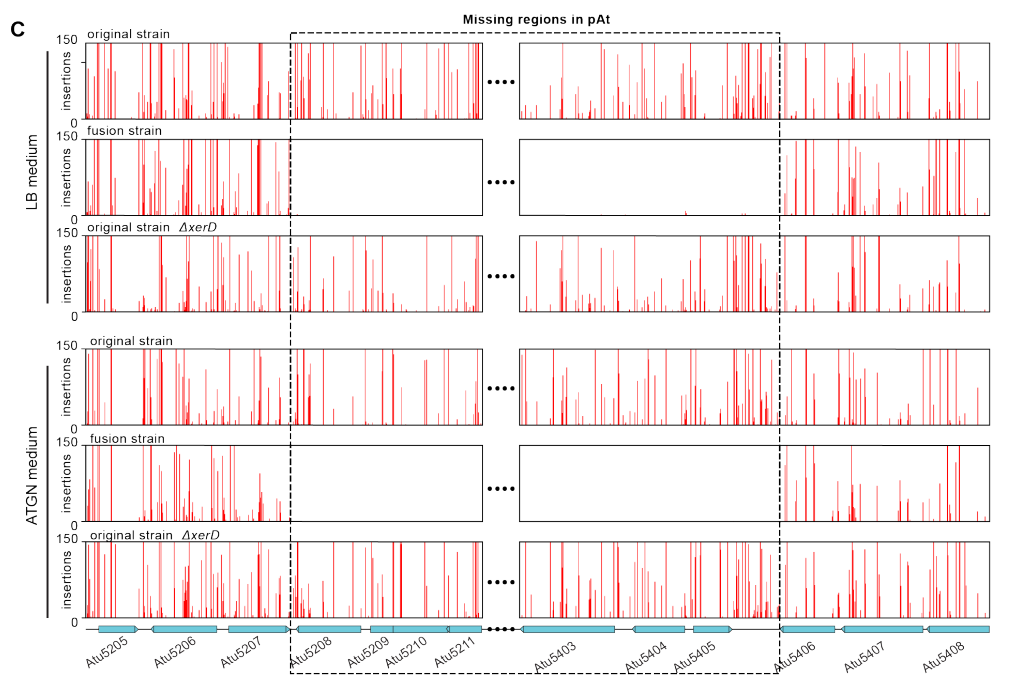

**Figure S3. *xerD* is not synthetically lethal with genes that are missing on Ch1 and pAt in the fusion strain. Related to Figure 3.** Tn-seq was performed in three different strains: original strain (AtWX063, top), fusion strain (AtWX001, middle), and original  $\Delta xerD$  strain (AtWX092, bottom). Cells were growing on LB or ATGN plates as indicated.

**(A)** Transposon insertions at *xerD* locus. *xerD* was successfully deleted from the original strain as indicated by no insertions at this locus in original  $\Delta xerD$  (bottom).

**(B)** Transposon insertions at the Ch1 region that is missing on the fused chromosome.  $\Delta xerD$  cells tolerated insertions at these regions (bottom), suggesting *xerD* is not synthetically lethal with these missing genes.

**(C)** Transposon insertions at the pAt region that is missing from the fusion strain.  $\Delta xerD$  cells tolerated insertions at these regions (bottom), suggesting *xerD* is not synthetically lethal with these missing genes. Only the junctions are shown.

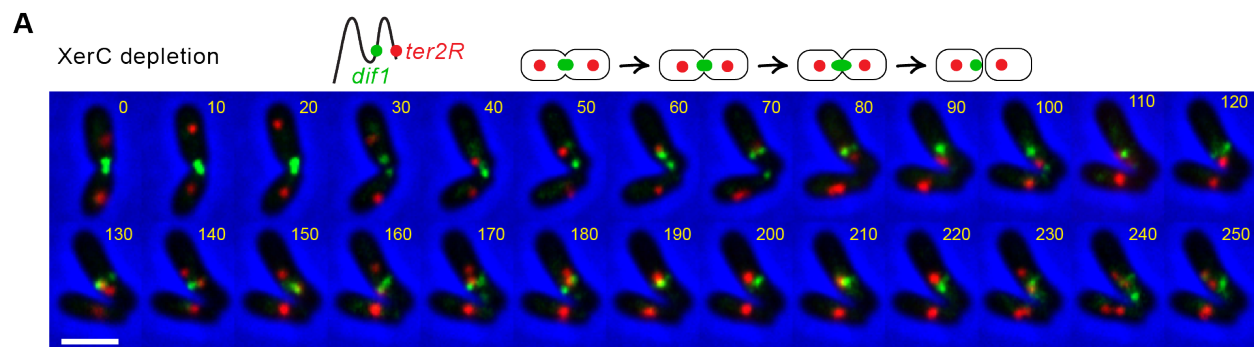

**B**

| depletion time<br>No. of cells analyzed      | WT               | XerC depletion  |                  |                  |                  | XerD depletion  |                 |                 |                  |
|----------------------------------------------|------------------|-----------------|------------------|------------------|------------------|-----------------|-----------------|-----------------|------------------|
|                                              | 0h<br>1154 cells | 0h<br>902 cells | 3h<br>1163 cells | 6h<br>1004 cells | 12h<br>828 cells | 0h<br>905 cells | 3h<br>942 cells | 6h<br>980 cells | 12h<br>715 cells |
| growing cell with one focus                  | 67.7%            | 64.5%           | 65.0%            | 44.7%            | 24.0%            | 53.7%           | 57.1%           | 49.0%           | 20.3%            |
| growing cell with two foci                   | 4.8%             | 6.3%            | 3.6%             | 4.5%             | 2.1%             | 10.5%           | 7.0%            | 7.4%            | 3.5%             |
| early dividing cell                          | 8.5%             | 10.9%           | 11.5%            | 11.1%            | 7.0%             | 14.4%           | 10.9%           | 14.4%           | 4.6%             |
| deeply constricted cell with one or two foci | 12.0%            | 8.6%            | 8.1%             | 22.7%            | 21.5%            | 10.4%           | 13.4%           | 20.7%           | 18.3%            |
| cells without foci                           | 5.9%             | 7.9%            | 10.1%            | 11.9%            | 38.2%            | 7.1%            | 8.9%            | 6.4%            | 49.5%            |
| cell with foci and abnormal cell shape       | 1.2%             | 1.8%            | 1.7%             | 5.2%             | 7.2%             | 4.0%            | 2.7%            | 2.0%            | 3.8%             |

**Figure S4. Quantitative analysis of *dif1* localization in XerC/D depletion strains. Related to Figure 4.**

**(A)** Time-lapse progression of XerC depletion strain containing *dif1* (green) and *ter2R* (red) on the fused chromosome (AtWX514). *dif1* was visualized as shown in **Figure 4B** whereas *ter2R* was visualized by inserting visualization cassette, *mcherry-parBP1-parSP1*, at 39.8 kb away from *ter2R*.

**(B)** Quantitative analysis of *dif1* localization patterns in the WT fusion strain (AtWX455), XerC-depleted (AtWX467) and XerD-depleted (AtWX471) fusion strains. Snapshot images of cells growing in LB medium were collected at 0 h, 3 hr, 6 hr, 12 hr upon the depletion. Cells were classified and quantified according to cell cycle and the number of foci. After 6 hr depletion, the percentage of deeply constricted cells increased by about two fold. Upon 12 hr depletion, the proportion of cells without foci rose by over three fold.

| Lab          | Isolate name                 | Configuration | References            |
|--------------|------------------------------|---------------|-----------------------|
| L.M. Banta   | C58                          | fusion        | Banta Lab collection  |
| P. Brown     | C58                          | fusion        | S1                    |
| C. Fuqua     | C58                          | fusion        | S2                    |
| S.K. Farrand | C58                          | fusion        | S3                    |
| X. Wang      | C58 fusion (AtWX001)         | fusion        | This study            |
| S.C. Winans  | C58                          | fusion        | S4                    |
| P. Zambryski | C58                          | fusion        | S5                    |
| J.H. Chang   | C58 A8                       | original      | Chang Lab collection  |
| S.K. Farrand | C58 C1RS, C58 UIA5, C58 NTL4 | original      | S6 S7                 |
| C. Fuqua     | C58                          | original      | S8                    |
| S.B. Gelvin  | C58                          | original      | Gelvin Lab collection |
| B. Goodner   | C58 BG                       | original      | S9                    |
| R. Hallez    | C58                          | original      | Hallez Lab collection |
| C.I. Kado    | C58 NT1REB                   | original      | S10                   |
| E-M. Lai     | C58 A107                     | original      | S11                   |
| K.S. Mysorel | C58                          | original      | S12                   |
| E.W. Nester  | C58 A136, C58-3, EN58        | original      | S13 S14               |
| X. Wang      | C58 original (AtWX063)       | original      | S15                   |
| P. Zambryski | C58                          | original      | S16                   |

**Table S1. Chromosomal configuration of *A. tumefaciens* strains in different labs. Related to STAR Methods.**

| Sample name                        | Figure          | Reference  | Identifier                 |
|------------------------------------|-----------------|------------|----------------------------|
| 401_Wang_HiC_AtWX063_ATGN          | 1A              | S15        | <a href="#">GSM5542437</a> |
| 438_Wang_WGS_AtWX063_ATGN_rep2     | 1A              | S15        | <a href="#">GSM5689555</a> |
| 500_Wang_HiC_AtWX001_ATGN          | 1BC, S1A        | This study | SAMN27387414               |
| 501_Wang_WGS_AtWX001_ATGN          | 1BC             | This study | SAMN27387415               |
| 502_Wang_Tnseq_AtWX063_LB          | 2D, 3A, S2F, S3 | This study | SAMN27387416               |
| 503_Wang_Tnseq_AtWX001_LB          | 2D, 3A, S2F, S3 | This study | SAMN27387417               |
| 504_Wang_Tnseq_AtWX387_LB          | 3C              | This study | SAMN27387418               |
| 505_Wang_Tnseq_AtWX398_LB          | 3C              | This study | SAMN27387419               |
| 506_Wang_Tnseq_AtWX035_LB          | 3D              | This study | SAMN27387420               |
| 507_Wang_Tnseq_AtWX108_LB          | 3D              | This study | SAMN27387421               |
| 508_Wang_Tnseq_AtWX063_ATGN        | S1B, S2A, S3    | This study | SAMN27387422               |
| 509_Wang_Tnseq_AtWX001_ATGN        | S1B, S2A, S3    | This study | SAMN27387423               |
| 510_Wang_ChIP_antiGFP_AtWX367_ATGN | S2C             | This study | SAMN27387424               |
| 511_Wang_input_AtWX367_ATGN        | S2C             | This study | SAMN27387425               |
| 512_Wang_ChIP_antiGFP_AtWX370_ATGN | S2C             | This study | SAMN27387426               |
| 513_Wang_input_AtWX370_ATGN        | S2C             | This study | SAMN27387427               |
| 514_Wang_ChIP_antiGFP_AtWX377_ATGN | S2C             | This study | SAMN27387428               |
| 515_Wang_input_AtWX377_ATGN        | S2C             | This study | SAMN27387429               |
| 516_Wang_ChIP_antiGFP_AtWX379_ATGN | S2C             | This study | SAMN27387430               |
| 517_Wang_input_AtWX379_ATGN        | S2C             | This study | SAMN27387431               |
| 518_Wang_Tnseq_AtWX092_LB          | S3              | This study | SAMN27387432               |
| 519_Wang_Tnseq_AtWX092_ATGN        | S3              | This study | SAMN27387433               |

**Table S2. Next generation sequencing samples used in this study. Related to STAR Methods.**



| Strains used in main figures |                                                                                                                                                                                                                                   |            |                                     |
|------------------------------|-----------------------------------------------------------------------------------------------------------------------------------------------------------------------------------------------------------------------------------|------------|-------------------------------------|
| Strain                       | Genotype                                                                                                                                                                                                                          | Reference  | Figure                              |
| AtWX001                      | C58 fusion, wild type                                                                                                                                                                                                             | This study | 1BCEF, 2BCD, 3A, S1AB, S2AEFGH, S3, |
| AtWX063                      | C58 original, wild type                                                                                                                                                                                                           | S15        | 1ADF, 2BCD, 3A, S1B, S2AEFGH, S3    |
| AtWX263                      | C58 original, carrying pWX970, pSRKKm <i>Plac rfp-repB<sup>Ch2</sup></i> (Atu3923/ATU_RS18280) terminator <i>Plac egfp-parB1</i> (Atu2828/ATU_RS13770) terminators                                                                | S15        | 2A                                  |
| AtWX366                      | C58 fusion, carrying pWX970, pSRKKm <i>Plac rfp-repB<sup>Ch2</sup></i> (Atu3923/ATU_RS18280) terminator <i>Plac egfp-parB1</i> (Atu2828/ATU_RS13770) terminators                                                                  | This study | 2A                                  |
| AtWX025                      | C58 fusion, <i>tetRA::a-attTn7 pLac repB<sup>Ch2</sup> gen, ΔrepB<sup>Ch2</sup></i>                                                                                                                                               | This study | 2C                                  |
| AtWX089                      | C58 original, <i>ΔrepB<sup>Ch2</sup></i> (Atu3923/ATU_RS18280)::amp                                                                                                                                                               | S15        | 2C                                  |
| AtWX192                      | C58 original, <i>tetRA::gen Ptral-riboswitch-parB1</i> (Atu2828/ATU_RS13770) <i>traR</i>                                                                                                                                          | S15        | 2C                                  |
| AtWX194                      | C58 fusion, <i>tetRA::gen Ptral-riboswitch-parB1</i> (Atu2828/ATU_RS13770) <i>traR</i>                                                                                                                                            | This study | 2C                                  |
| AtWX323                      | C58 fusion, <i>xerC</i> (Atu2628/ATU_RS12790)::terminator <i>gen LacI terminators Plac riboswitch xerC</i>                                                                                                                        | This study | 3B, S2B                             |
| AtWX327                      | C58 fusion, <i>xerD</i> (Atu3629/ATU_RS16850)::terminator <i>gen lacI terminators Plac riboswitch xerD</i>                                                                                                                        | This study | 3B, S2B                             |
| AtWX331                      | C58 original, <i>xerC</i> (Atu2628/ATU_RS12790)::terminator <i>gen LacI terminators Plac riboswitch xerC</i>                                                                                                                      | This study | 3B, S2B                             |
| AtWX332                      | C58 original, <i>xerD</i> (Atu3629/ATU_RS16850)::terminator <i>gen lacI terminators Plac riboswitch xerD</i>                                                                                                                      | This study | 3B, S2B                             |
| AtWX387                      | C58 fusion, <i>ΔrecA</i> (Atu1873/ATU_RS09160)::amp                                                                                                                                                                               | This study | 3C                                  |
| AtWX398                      | C58 original, <i>ΔrecA</i> (Atu1873/ATU_RS09160)::amp                                                                                                                                                                             | This study | 3C                                  |
| AtWX035                      | C58 fusion, <i>Δsmc</i> (Atu0801/ATU_RS03945)                                                                                                                                                                                     | This study | 3D                                  |
| AtWX108                      | C58 original, <i>Δsmc</i> (Atu0801/ATU_RS03945)                                                                                                                                                                                   | S15        | 3D                                  |
| AtWX502                      | C58 fusion, <i>xerC</i> (Atu2628/ATU_RS12790)::terminator <i>gen LacI terminators Plac riboswitch xerC</i> , carrying pWX1076, pSRKKm <i>cymR cuO Plac cuO At parC</i> (Atu1158/ATU_RS05720) <i>At parE</i> (Atu1622/ATU_RS07965) | This study | 3E                                  |
| AtWX503                      | C58 fusion, <i>xerD</i> (Atu3629/ATU_RS16850)::terminator <i>gen lacI terminators Plac riboswitch xerD</i> , carrying pWX1076, pSRKKm <i>cymR cuO Plac cuO At parC</i> (Atu1158/ATU_RS05720) <i>At parE</i> (Atu1622/ATU_RS07965) | This study | 3E                                  |
| AtWX540                      | C58 fusion, <i>xerC</i> (Atu2628/ATU_RS12790)::terminator <i>gen LacI</i>                                                                                                                                                         | This study | 3E                                  |

|                                                                    |                                                                                                                                                                                                                                                                                                                                                                    |                  |               |
|--------------------------------------------------------------------|--------------------------------------------------------------------------------------------------------------------------------------------------------------------------------------------------------------------------------------------------------------------------------------------------------------------------------------------------------------------|------------------|---------------|
|                                                                    | terminators <i>Plac riboswitch xerC</i> , carrying pWX1080, pSRKKm <i>cymR cuO Plac cuO Ec parE-parC</i>                                                                                                                                                                                                                                                           |                  |               |
| AtWX541                                                            | C58 fusion, <i>xerD</i> (Atu3629/ATU_RS16850):: <i>terminator gen lacI</i> terminators <i>Plac riboswitch xerD</i> , carrying pWX1080, pSRKKm <i>cymR cuO Plac cuO Ec parE-parC</i>                                                                                                                                                                                | This study       | 3E            |
| AtWX455                                                            | C58 fusion, <i>ygfp-parB<sup>MT1</sup>-parS<sup>MT1</sup></i> inserted between Atu1460/ATU_RS07195 and Atu1461/ATU_RS07200, 57 kb from <i>dif1</i>                                                                                                                                                                                                                 | This study       | 4B, S4B       |
| AtWX467                                                            | C58 fusion, <i>xerC</i> (Atu2628/ATU_RS12790):: <i>terminator gen LacI</i> terminators <i>Plac riboswitch xerC</i> ; <i>ygfp-parB<sup>MT1</sup>-parS<sup>MT1</sup></i> inserted between Atu1460/ATU_RS07195 and Atu1461/ATU_RS07200, 57 kb from <i>dif1</i>                                                                                                        | This study       | 4CD, S4B      |
| AtWX471                                                            | C58 fusion, <i>xerD</i> (Atu3629/ATU_RS16850):: <i>terminator gen lacI</i> terminators <i>Plac riboswitch xerD</i> ; <i>ygfp-parB<sup>MT1</sup>-parS<sup>MT1</sup></i> inserted between Atu1460/ATU_RS07195 and Atu1461/ATU_RS07200, 57 kb from <i>dif1</i>                                                                                                        | This study       | 4D, S4B       |
| <b>Strains used for strain building or in supplemental figures</b> |                                                                                                                                                                                                                                                                                                                                                                    |                  |               |
| <b>Strain</b>                                                      | <b>Genotype</b>                                                                                                                                                                                                                                                                                                                                                    | <b>Reference</b> | <b>Figure</b> |
| AtWX367                                                            | C58 fusion, <i>xerC-gfpmut3</i> (Atu2628/ATU_RS12790)                                                                                                                                                                                                                                                                                                              | This study       | S2C           |
| AtWX370                                                            | C58 original, <i>xerD-gfpmut3</i> (Atu3629/ATU_RS16850)                                                                                                                                                                                                                                                                                                            | This study       | S2C           |
| AtWX377                                                            | C58 original, <i>xerC-gfpmut3</i> (Atu2628/ATU_RS12790)                                                                                                                                                                                                                                                                                                            | This study       | S2C           |
| AtWX379                                                            | C58 fusion, <i>xerD-gfpmut3</i> (Atu3629/ATU_RS16850)                                                                                                                                                                                                                                                                                                              | This study       | S2C           |
| AtWX439                                                            | C58 original, $\Delta dif1::amp$                                                                                                                                                                                                                                                                                                                                   | This study       | S2E           |
| AtWX440                                                            | C58 original, $\Delta dif^{PA}::amp$                                                                                                                                                                                                                                                                                                                               | This study       | S2E           |
| AtWX441                                                            | C58 fusion, $\Delta dif1::amp$                                                                                                                                                                                                                                                                                                                                     | This study       | S2E           |
| AtWX092                                                            | C58 original, $\Delta xerD$ (Atu3629/ATU_RS16850):: <i>amp</i>                                                                                                                                                                                                                                                                                                     | This study       | S2E, S3       |
| AtWX375                                                            | C58 original, $\Delta xerC$ (Atu2628/ATU_RS12790):: <i>amp</i>                                                                                                                                                                                                                                                                                                     | This study       | S2E           |
| AtWX514                                                            | C58 fusion, <i>xerC</i> (Atu2628/ATU_RS12790):: <i>terminator gen LacI</i> terminators <i>Plac riboswitch xerC</i> ; <i>ygfp-parB<sup>MT1</sup>-parS<sup>MT1</sup></i> inserted between Atu1460/ATU_RS07195 and Atu1461 57 kb from <i>dif1</i> ; <i>mCherry-parB<sup>P1</sup>-parS<sup>P1</sup></i> inserted between Atu4854 and Atu4856 39.8 kb from <i>ter2R</i> | This study       | S4A           |
| <b>Plasmids used in this study</b>                                 |                                                                                                                                                                                                                                                                                                                                                                    |                  |               |
| <b>Plasmid</b>                                                     | <b>Description</b>                                                                                                                                                                                                                                                                                                                                                 | <b>Reference</b> |               |
| pWX811                                                             | pNPTS138 $\Delta repB^{Ch2}$ (Atu3923/ATU_RS18280):: <i>amp</i>                                                                                                                                                                                                                                                                                                    | This study       |               |
| pWX813                                                             | pMiniTn7 pLac <i>At repB<sup>Ch2</sup></i> (Atu3923/ATU_RS18280)                                                                                                                                                                                                                                                                                                   | This study       |               |
| pWX832                                                             | pNPTS138 $\Delta smc$ (Atu0801/ATU_RS03945)                                                                                                                                                                                                                                                                                                                        | S15              |               |
| pWX854                                                             | pNPTS138 $\Delta repB^{Ch2}$ (Atu3923/ATU_RS18280):: <i>amp</i>                                                                                                                                                                                                                                                                                                    | S15              |               |
| pWX855                                                             | pNPTS138 $\Delta xerD$ (Atu3629/ATU_RS16850):: <i>amp</i>                                                                                                                                                                                                                                                                                                          | This study       |               |
| pWX885                                                             | pMiniTn7 <i>Ptral-riboswitch-parB1</i> (Atu2828/ATU_RS13770) <i>traR</i> (Atu6134: ATU_RS23655)                                                                                                                                                                                                                                                                    | S15              |               |

|                         |                                                                                                                                     |                         |  |
|-------------------------|-------------------------------------------------------------------------------------------------------------------------------------|-------------------------|--|
| pWX902                  | pNPTS138 <i>tetRA::gen Ptral-riboswitch-parB1</i> (Atu2828/ATU_RS13770) <i>traR</i>                                                 | S15                     |  |
| pWX914                  | pNPTS138 $\Delta$ <i>parB1</i> (Atu2828/ATU_RS13770):: <i>amp</i>                                                                   | S15                     |  |
| pWX916                  | pACYC terminator <i>Ppen cfp-parB<sup>P1</sup>-parS<sup>P1</sup></i> ( <i>amp</i> )                                                 | S17                     |  |
| pWX923                  | pACYC terminator <i>Ppen CFP-ParBP1 parSP1 terminators</i>                                                                          | This study              |  |
| pWX926                  | pNPTS138 <i>Ppen ygfp-parB<sup>MT1</sup>-parS<sup>MT1</sup></i> at Atu1460/ATU_RS07195                                              | This study              |  |
| pWX930                  | pNPTS138 <i>Ppen cfp-parB<sup>P1</sup>-parS<sup>P1</sup></i> at Atu3054/ATU_RS14060                                                 | S17                     |  |
| pWX936                  | pNPTS138 <i>PT7strong cfp-parB<sup>P1</sup>-parS<sup>P1</sup></i> at Atu3054/ATU_RS14060                                            | S17                     |  |
| pWX943                  | pNPTS138 terminator <i>gen lacI terminators Plac-riboswitch</i>                                                                     | This study              |  |
| pWX944                  | pNPTS138 terminator <i>gen LacI terminators Plac riboswitch xerC</i> (Atu2628/ATU_RS12790)                                          | This study              |  |
| pWX945                  | pNPTS138 terminator <i>gen LacI terminators Plac riboswitch xerD</i> (Atu3629/ATU_RS16850)                                          | This study              |  |
| pWX965                  | pNPTS138 <i>PT7strong ygfp-parB<sup>MT1</sup>-parS<sup>MT1</sup></i> at Atu1460/ATU_RS07195                                         | This study              |  |
| pWX968                  | pNPTS138 <i>PT7strong cfp-parB<sup>P1</sup>-parS<sup>P1</sup></i> at Atu4854                                                        | This study              |  |
| pWX970                  | pSRKKm <i>Plac rfp-repB<sup>Ch2</sup></i> (Atu3923/ATU_RS18280) terminator <i>Plac egfp-parB1</i> (Atu2828/ATU_RS13770) terminators | S15                     |  |
| pWX998                  | pNPTS138 <i>PT7strong mcherry-parB<sup>P1</sup>-parS<sup>P1</sup></i> at Atu4854                                                    | This study              |  |
| pWX1006                 | pNPTS138 $\Delta$ <i>xerC</i> (Atu2628/ATU_RS12790):: <i>amp</i>                                                                    | This study              |  |
| pWX1007                 | pNPTS138 $\Delta$ <i>recA</i> (Atu1873/ATU_RS09160):: <i>amp</i>                                                                    | This study              |  |
| pWX1008                 | pNPTS138 <i>xerC-gfpmut3</i> (Atu2628/ATU_RS12790)                                                                                  | This study              |  |
| pWX1009                 | pNPTS138 <i>xerD-gfpmut3</i> (Atu3629/ATU_RS16850)                                                                                  | This study              |  |
| pWX1039                 | pNPTS138 $\Delta$ <i>dif1</i> :: <i>amp</i>                                                                                         | This study              |  |
| pWX1040                 | pNPTS138 $\Delta$ <i>dif<sup>At</sup></i> :: <i>amp</i>                                                                             | This study              |  |
| pWX1076                 | pSRKKm <i>cymR cuO Plac cuO At parC</i> (Atu1158/ATU_RS05720) <i>At parE</i> (Atu1622/ATU_RS07965)                                  | This study              |  |
| pWX1080                 | pSRKKm <i>cymR cuO Plac cuO Ec parE-parC</i>                                                                                        | This study              |  |
| pHP45omega              | <i>omega-amp cassette</i>                                                                                                           | S18                     |  |
| pNPTS138                | <i>oriT sacB kan</i>                                                                                                                | S19                     |  |
| pSRKKm                  | Broad host-range, <i>Plac</i>                                                                                                       | S20                     |  |
| cumate induction system | pSRKKm <i>cymR cuO Plac cuO msfgfp</i>                                                                                              | S21 gift from Pam Brown |  |
| pLEXRparEC3             | <i>E. coli parE parC</i> expressed from IPTG inducible promotor                                                                     | S22                     |  |

**Table S3. Bacterial strains and plasmids used in this study. Related to STAR Methods.**

| Oligos  | Sequence                                              | Use             |
|---------|-------------------------------------------------------|-----------------|
| oWX0487 | aacggtctgataagagacaccggc                              | sequencing      |
| oWX1854 | cgccagggtttccagtcacgac                                | sequencing      |
| oWX1855 | tcacacaggaacagctatgac                                 | sequencing      |
| oWX2021 | tggcgccaagcttctctgcaggatcaggcgcagaactctacgatgac       | pWX811          |
| oWX2022 | ggaccggtattcggcaaacagcgtaagattggcgaatatctgtttc        | pWX811          |
| oWX2023 | gaaaacagatattcgccaatctacgctgtttgccgaataaccggctc       | pWX811          |
| oWX2024 | gctagcgaattcgtggatccagatcgcgcagagacaattgctgtttg       | pWX811          |
| oWX2027 | gcgcatatgagcagaaaacagatattcgcc                        | pWX813          |
| oWX2028 | tttctcgagtactgcttgaccgggtattcggc                      | pWX813          |
| oWX2029 | acaaatccgcccgtaggagcttg                               | sequencing      |
| oWX2031 | gaactgggtgtagcgtcgaagc                                | sequencing      |
| oWX2042 | gcatccggtatgaaggatggatc                               | sequencing      |
| oWX2144 | tggcgccaagcttctctgcaggattagtgctgtgataaatg             | pWX855          |
| oWX2146 | cccatgagcggacaaccgatggcAggcaaaaacctgattagagcgac       | pWX855          |
| oWX2148 | ctgcaaatgtttacgaagcg                                  | Sequencing      |
| oWX2149 | gaatagatattctgcatcgc                                  | Sequencing      |
| oWX2208 | aaataaacaataaggggtccgctgcatcgggtgtccgctca             | pWX855          |
| oWX2209 | gcctactgattaagcattggaaggcaaaaacctgattagag             | pWX855          |
| oWX2210 | cgcggaaccctattgttta                                   | pWX1006/pWX1007 |
| oWX2211 | ttaccaatgcttaatacagtgaggc                             | pWX1006/PWX1007 |
| oWX2377 | ggcttcttgttatcaagcgcag                                | sequencing      |
| oWX2379 | cttttccatcagctctgttaccg                               | sequencing      |
| oWX2395 | tcttcgctattacgccagatcc                                | sequencing      |
| oWX2397 | gatgacggtaactacaaaacc                                 | sequencing      |
| oWX2403 | catggatccatgtcgacagactctctagcttgaggcatc               | pWX923          |
| oWX2404 | gctcagccggccgcaacgttctgcatgctgca                      | pWX923          |
| oWX2407 | ctctagatagcgcagctgaattc                               | pWX926/pWX968   |
| oWX2408 | ggttatgctagttattgctcagcc                              | pWX926/pWX968   |
| oWX2409 | ggcgccaagcttctctgcaggatcgaataatgctccgaaaaatg          | pWX926          |
| oWX2410 | gaattcagcatgcgctatctagagtcagcgcaccagccggatgctgc       | pWX926          |
| oWX2411 | ggctgagcaataactagcataaccaagcggccccagtgccgctcc         | pWX926          |
| oWX2412 | ctagcgaattcgtggatccagattggtgagctatcgcgatcatggc        | pWX926          |
| oWX2418 | atatcggaggatggcgacc                                   | sequencing      |
| oWX2419 | ccttctcgtggtaagcgtgc                                  | sequencing      |
| oWX2424 | ttctgcccctccgatcaaacagg                               | sequencing      |
| oWX2425 | ccggactccacatccgcagatttc                              | sequencing      |
| oWX2426 | ggccttctgcttagctagagcggc                              | sequencing      |
| oWX2426 | ggccttctgcttagctagagcggc                              | sequencing      |
| oWX2431 | taatacagactcactataggagaccacaacgcttcatctggttacgatcaatc | pWX965          |
| oWX2432 | ggctccctatagtgagtcgtattaattcgaatgatgacctcgtttccacc    | pWX965          |
| oWX2450 | gtacctatagtgagtcgtatgaaattgttatccgctcaca              | pWX943          |
| oWX2451 | tgtgagcggataacaatttcatacagactcactataggtac             | pWX943          |
| oWX2452 | gctagcgaattcgtggatccagatctgttgataccccctg              | pWX943          |
| oWX2453 | tggcgccaagcttctctgcaggataagaccgctctgaacacg            | pWX944          |
| oWX2456 | tccgtcacgcggtactccatctgttgataccccctg                  | pWX944          |
| oWX2457 | gcgaggggtatcaacaagatggagtaccgctgaccga                 | pWX944          |
| oWX2458 | gctagcgaattcgtggatccagatcaggaaatcgggtcgtccg           | pWX944          |
| oWX2459 | tggcgccaagcttctctgcaggattcagccacagcgaatg              | pWX945          |
| oWX2462 | gccatcgggtgtccgctcatctgttgataccccctg                  | pWX945          |

|         |                                                       |                 |
|---------|-------------------------------------------------------|-----------------|
| oWX2463 | gcgaggggatcaacaagatgagcggacaaccgatgc                  | pWX945          |
| oWX2464 | gctagcgaattcgtggatccagatacctcctactgttcgagg            | pWX945          |
| oWX2482 | agcttctcgcaggataaaaaaaccccgcttcgcggggttagtgcggtactggg | pWX943          |
| oWX2483 | cgcgaaagcgggggtttttttccatccccgaaactatgc               | pWX944          |
| oWX2484 | gcatagttcgggggatggaaaaaaaaaaccccgcttcgcg              | pWX944          |
| oWX2485 | cgaaagcgggggtttttttcatggggtgcgcctgccc                 | pWX945          |
| oWX2486 | cggaaggcgcaccccatgaaaaaaaaaaccccgcttcgcg              | pWX945          |
| oWX2497 | aagtcaagttgaaggatgataccc                              | sequencing      |
| oWX2491 | catcaaacatcgaccacgg                                   | sequencing      |
| oWX2492 | gaacgatgcctcattcagc                                   | sequencing      |
| oWX2493 | tgcgacatcgataacgtactgg                                | sequencing      |
| oWX2514 | cgccaagcttctcgcaggatctcgccaattagaatggcctgtg           | pWX968          |
| oWX2515 | aattcagcatgcgctatctagagttaaatagtgctcctcgaaag          | pWX968          |
| oWX2516 | ctgagcaataactagcataaccgctgctgctcggcgctactatc          | pWX968          |
| oWX2517 | agcgaattcgtggatccagataccgctatcgatcagcaattcgatac       | pWX968          |
| oWX2518 | tgaccacctgccagaacaagct                                | sequencing      |
| oWX2519 | ggcaagttcatcaagacctgcga                               | sequencing      |
| oWX2584 | ttcaagctaaaggaggtggaaacatggcagcaaggagaggaag           | pWX998          |
| oWX2585 | ctgctgaccatgagctcgaattctttgtataattcgtccattccacc       | pWX998          |
| oWX2589 | cttctctccctgctgaccatgtttccacctcttaagcttg              | pWX998          |
| oWX2590 | ggtggaatggacgaattatacaagaattcgagctcatggtcgagcag       | pWX998          |
| oWX2601 | cgccaagcttctcgcaggatccagaaagaccgtctcgaacacgcc         | pWX1006         |
| oWX2602 | aaataaacaataggggtccgcgcacgcggctactccattccatcccc       | pWX1006         |
| oWX2603 | gcctcactgattaagcattggtgaagaaatctacgacaacgccacc        | pWX1006         |
| oWX2604 | ctagcgaattcgtggatccagataccagcatccagggtcatgcg          | pWX1006         |
| oWX2605 | ggcgccaagcttctcgcaggatcgcgatgctcgggtcatcgaaaaac       | pWX1007         |
| oWX2606 | aaataaacaataggggtccgcgggacgcgacgagggtctgatagattc      | pWX1007         |
| oWX2607 | gcctcactgattaagcattggtgaagaattttgtccatccgaaccac       | pWX1007         |
| oWX2608 | gctagcgaattcgtggatccagataccgctcagcgtatcctcgggcag      | pWX1007         |
| oWX2609 | tggcgccaagcttctcgcaggatctcgcgtctttctggccaac           | pWX1008         |
| oWX2610 | tccttactggatcctccagatccggcagctgggtggcggtgtcg          | pWX1008         |
| oWX2611 | ggatctggaggatccagtaaaggag                             | pWX1008/pWX1009 |
| oWX2612 | ttattgtatagttcatccatgcc                               | pWX1008/pWX1009 |
| oWX2613 | ggcatggatgaactatacaataaagcaggaattggttaaccgtaaac       | pWX1008         |
| oWX2614 | gctagcgaattcgtggatccagatagaaaggagagaccggtgccttg       | pWX1008         |
| oWX2615 | tggcgccaagcttctcgcaggatcttcttattcggaagggtcgc          | pWX1009         |
| oWX2616 | tccttactggatcctccagatccatcaaggttttgcctgtttggc         | pWX1009         |
| oWX2617 | ggcatggatgaactatacaataaagcagaccggaaccgcccggataatc     | pWX1009         |
| oWX2618 | gctagcgaattcgtggatccagatcgaatgttcgagcatataaacgcg      | pWX1009         |
| oWX2624 | ggataataccgcgccacatagcag                              | sequencing      |
| oWX2625 | tgcgaaactattaactggcgaac                               | sequencing      |
| oWX2626 | gtaatacgactcactagtggggcc                              | sequencing      |
| oWX2627 | gataatggtctgtagttgaacgc                               | sequencing      |
| oWX2628 | ttgactagagggtcgacgatgcc                               | sequencing      |
| oWX2720 | tgaccgttctcgtgctttacgg                                | sequencing      |
| oWX2796 | tggcgccaagcttctcgcaggatccgggttcttgataagaacggtg        | pWX1039         |
| oWX2797 | aaataaacaataggggtccgcggtgtttgtagctgggtacattc          | pWX1039         |
| oWX2798 | tagaatgtaccagctacaacaacgcggaaccctattgtttattt          | pWX1039         |
| oWX2799 | aaatcctaggttcagagacaaattaccaatgcttaacagtgaggc         | pWX1039         |

|              |                                                  |                     |
|--------------|--------------------------------------------------|---------------------|
| oWX2800      | gcctcactgattaagcattggtaaattgtctctgaaacctaggattg  | pWX1039             |
| oWX2801      | gctagcgaattcgtggatccagatctctgcgccgcatcttcgacc    | pWX1039             |
| oWX2802      | tggcgccaagcttctctgcaggattcgggttcttgataagaacggtg  | pWX1040             |
| oWX2803      | aaataaacaatagggttccgcgaaataggaattgggtacattc      | pWX1040             |
| oWX2804      | tagaatgtaccaattccctatttcgcggaaccctattgtttattt    | pWX1040             |
| oWX2805      | gccctgcgggacatcgcggaataattaccaatgcttaatcagtgaggc | pWX1040             |
| oWX2806      | gcctcactgattaagcattggtaattattccgcgatgtcccgcagggc | pWX1040             |
| oWX2807      | gctagcgaattcgtggatccagataagaactgctggccgttcacgc   | pWX1040             |
| oWX2847      | ctcacggtaaattggtcgagcgatg                        | sequencing          |
| oWX2848      | tcgatgaggatggccggatgagac                         | sequencing          |
| oWX2849      | gcttgatctcacggtaaattggtcg                        | sequencing          |
| oWX2850      | tggttatgctctcgacgagcgtc                          | sequencing          |
| oWX2912      | atcagagcaaggaagacagcatatgggaaaagatctgtacctccg    | pWX1076             |
| oWX2913      | catgtttccacctcttcaatggtcaccgcgcaaaactcccgtcgcg   | pWX1076             |
| oWX2914      | ccattgaaaggagggtgaaacatgatggacgacagcaacgatctcttc | pWX1076             |
| oWX2915      | atggcagcagttttccgctggc                           | pWX1076             |
| oWX2920      | tcgaattgctttcgaattgctagctcaaataccagattatccgcg    | sequencing          |
| oWX2922      | gcaatcaactgcccgggtctcc                           | sequencing          |
| oWX2923      | atcggtaagtccaccgcgatggc                          | sequencing          |
| oWX2924      | agcttgctggcgccgagcgtatag                         | sequencing          |
| oWX2925      | gctgcgggtttcggctgcacattc                         | sequencing          |
| oWX2926      | ttcagggattcggcatcggccgg                          | sequencing          |
| oWX2927      | gcagcggcaggatggcctgattg                          | sequencing          |
| oWX2936      | ttatcgagcaaggaagacagcatatgacgcaaactataacgctgatg  | pWX1080             |
| oWX2939      | cgaattgctttcgaattgctagcttactcttgcgtatcaccgctgc   | pWX1080             |
| oWX2940      | tctgcatgcaggcggtaaaattctc                        | sequencing          |
| oWX2941      | cagacgaaagagcgtctctcttcg                         | sequencing          |
| oWX2942      | cagacgaaagagcgtctctcttcg                         | sequencing          |
| oWX2943      | accgcataacctgcgtgaagtggc                         | sequencing          |
| oWX2944      | actgcgtcatcttgccaaactgg                          | sequencing          |
| oWX2945      | agtgatctgccgagctgtcgaag                          | sequencing          |
| F1 (oWX2212) | tgtctgggttctggaattcgacgc                         | check configuration |
| R1 (oWX2213) | aggtccgtggtatagttgtaggc                          | check configuration |
| F2 (oWX2214) | cttgatccagagtgattcgacgc                          | check configuration |
| R2 (oWX2215) | cctgtgaacaacgcctttgacc                           | check configuration |

**Table S4. Oligonucleotides used in this study. Related to STAR Methods.**

## Supplemental References

- S1. Figueroa-Cuilan, W., Daniel, J.J., Howell, M., Sulaiman, A., and Brown, P.J. (2016). Mini-Tn7 Insertion in an Artificial attTn7 Site Enables Depletion of the Essential Master Regulator CtrA in the Phytopathogen *Agrobacterium tumefaciens*. *Appl Environ Microbiol* 82, 5015-5025. 10.1128/AEM.01392-16.
- S2. Morton, E.R., Merritt, P.M., Bever, J.D., and Fuqua, C. (2013). Large deletions in the pAtC58 megaplasmid of *Agrobacterium tumefaciens* can confer reduced carriage cost and increased expression of virulence genes. *Genome Biol Evol* 5, 1353-1364. 10.1093/gbe/evt095.
- S3. Farrand, S.K., and Dessaux, Y. (1986). Proline biosynthesis encoded by the *noc* and *occ* loci of *Agrobacterium Ti* plasmids. *J Bacteriol* 167, 732-734. 10.1128/jb.167.2.732-734.1986.
- S4. Fuqua, C., Burbea, M., and Winans, S.C. (1995). Activity of the *Agrobacterium Ti* plasmid conjugal transfer regulator TraR is inhibited by the product of the *traM* gene. *J Bacteriol* 177, 1367-1373. 10.1128/jb.177.5.1367-1373.1995.
- S5. Robalino-Espinosa, J.S., Zupan, J.R., Chavez-Arroyo, A., and Zambryski, P. (2020). Segregation of four *Agrobacterium tumefaciens* replicons during polar growth: PopZ and PodJ control segregation of essential replicons. *Proc Natl Acad Sci U S A* 117, 26366-26373. 10.1073/pnas.2014371117.
- S6. Ellis, J.G., Kerr, A., Tempe, J., and Petit, A. (1979). Arginine catabolism: a new function of both octopine and nopaline Ti-plasmids of *Agrobacterium*. *Mol Gen Genet* 173, 263-269. 10.1007/BF00268636.
- S7. Luo, Z.Q., Clemente, T.E., and Farrand, S.K. (2001). Construction of a derivative of *Agrobacterium tumefaciens* C58 that does not mutate to tetracycline resistance. *Mol Plant Microbe Interact* 14, 98-103. 10.1094/MPMI.2001.14.1.98.
- S8. Morton, E.R., Platt, T.G., Fuqua, C., and Bever, J.D. (2014). Non-additive costs and interactions alter the competitive dynamics of co-occurring ecologically distinct plasmids. *Proc Biol Sci* 281, 20132173. 10.1098/rspb.2013.2173.
- S9. Goodner, B., Hinkle, G., Gattung, S., Miller, N., Blanchard, M., Qurollo, B., Goldman, B.S., Cao, Y., Askenazi, M., Halling, C., et al. (2001). Genome sequence of the plant pathogen and biotechnology agent *Agrobacterium tumefaciens* C58. *Science* 294, 2323-2328. 10.1126/science.1066803.
- S10. Chesnokova, O., Coutinho, J.B., Khan, I.H., Mikhail, M.S., and Kado, C.I. (1997). Characterization of flagella genes of *Agrobacterium tumefaciens*, and the effect of a bald strain on virulence. *Mol Microbiol* 23, 579-590. 10.1046/j.1365-2958.1997.d01-1875.x.
- S11. Wu, C.F., Santos, M.N.M., Cho, S.T., Chang, H.H., Tsai, Y.M., Smith, D.A., Kuo, C.H., Chang, J.H., and Lai, E.M. (2019). Plant-Pathogenic *Agrobacterium tumefaciens* Strains Have Diverse Type VI Effector-Immunity Pairs and Vary in In-Planta Competitiveness. *Mol Plant Microbe Interact* 32, 961-971. 10.1094/MPMI-01-19-0021-R.
- S12. Anand, A., Uppalapati, S.R., Ryu, C.M., Allen, S.N., Kang, L., Tang, Y., and Mysore, K.S. (2008). Salicylic acid and systemic acquired resistance play a role in attenuating crown gall disease caused by *Agrobacterium tumefaciens*. *Plant Physiol* 146, 703-715. 10.1104/pp.107.111302.
- S13. Watson, B., Currier, T.C., Gordon, M.P., Chilton, M.D., and Nester, E.W. (1975). Plasmid required for virulence of *Agrobacterium tumefaciens*. *J Bacteriol* 123, 255-264. 10.1128/jb.123.1.255-264.1975.
- S14. Liu, P., and Nester, E.W. (2006). Indoleacetic acid, a product of transferred DNA, inhibits vir gene expression and growth of *Agrobacterium tumefaciens* C58. *Proc Natl Acad Sci U S A* 103, 4658-4662. 10.1073/pnas.0600366103.
- S15. Ren, Z., Liao, Q., Karaboja, X., Barton, I.S., Schantz, E.G., Mejia-Santana, A., Fuqua, C., and Wang, X. (2022). Conformation and dynamic interactions of the multipartite genome in *Agrobacterium tumefaciens*. *Proc Natl Acad Sci U S A* 119. 10.1073/pnas.2115854119.
- S16. Grangeon, R., Zupan, J., Jeon, Y., and Zambryski, P.C. (2017). Loss of PopZ At activity in *Agrobacterium tumefaciens* by Deletion or Depletion Leads to Multiple Growth Poles, Minicells, and Growth Defects. *mBio* 8. 10.1128/mBio.01881-17.

- S17. Ren, Z., Liao, Q., Barton, I.S., Wiesler, E.E., Fuqua, C., and Wang, X. (2022). Centromere Interactions Promote the Maintenance of the Multipartite Genome in *Agrobacterium tumefaciens*. *mBio*, e0050822. 10.1128/mbio.00508-22.
- S18. Fellay, R., Frey, J., and Krisch, H. (1987). Interposon mutagenesis of soil and water bacteria: a family of DNA fragments designed for in vitro insertional mutagenesis of gram-negative bacteria. *Gene* 52, 147-154. 10.1016/0378-1119(87)90041-2.
- S19. Hinz, A.J., Larson, D.E., Smith, C.S., and Brun, Y.V. (2003). The *Caulobacter crescentus* polar organelle development protein PodJ is differentially localized and is required for polar targeting of the PleC development regulator. *Mol Microbiol* 47, 929-941. 10.1046/j.1365-2958.2003.03349.x.
- S20. Khan, S.R., Gaines, J., Roop, R.M., 2nd, and Farrand, S.K. (2008). Broad-host-range expression vectors with tightly regulated promoters and their use to examine the influence of TraR and TraM expression on Ti plasmid quorum sensing. *Appl Environ Microbiol* 74, 5053-5062. 10.1128/AEM.01098-08.
- S21. Choi, Y.J., Morel, L., Le Francois, T., Bourque, D., Bourget, L., Groleau, D., Massie, B., and Miguez, C.B. (2010). Novel, versatile, and tightly regulated expression system for *Escherichia coli* strains. *Appl Environ Microbiol* 76, 5058-5066. 10.1128/AEM.00413-10.
- S22. Madabhushi, R., and Mariani, K.J. (2009). Actin homolog MreB affects chromosome segregation by regulating topoisomerase IV in *Escherichia coli*. *Mol Cell* 33, 171-180. 10.1016/j.molcel.2009.01.001.
